# Supplementary material for: Adaptation to Endoplasmic Reticulum Stress Enhances Resistance of Oral Cancer Cells to Cisplatin by Up-Regulating Polymerase η and Increasing DNA Repair Efficiency
Source: PubMed Central journal article supplement (PMC7794796; doi:10.3390/ijms22010355), 2020-12-31

**Supplementary Figure 1.** Adaptation to ER stress enhances cisplatin resistance of SAS and HSC-3 cancer cell lines.

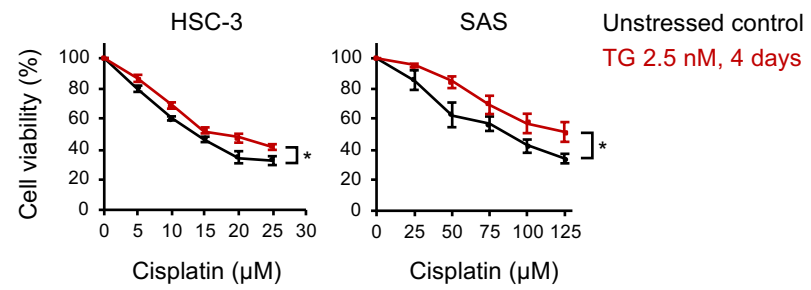

**Supplementary Figure 2.** Both S-phase cells and non-S phase cells acquire cisplatin resistance by adaptation to ER stress

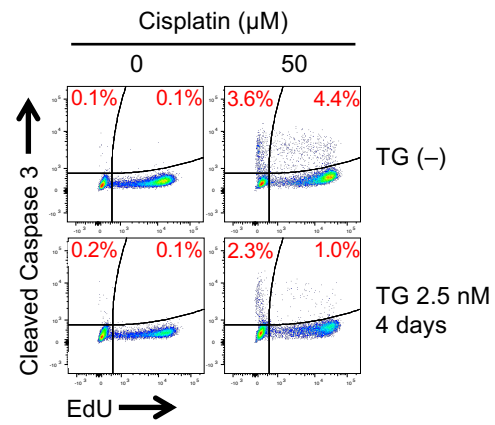

Supplementary Figure 3. Induction of *PUMA* and *NOXA* is not compromised in OECM1 cells harboring p53 missense

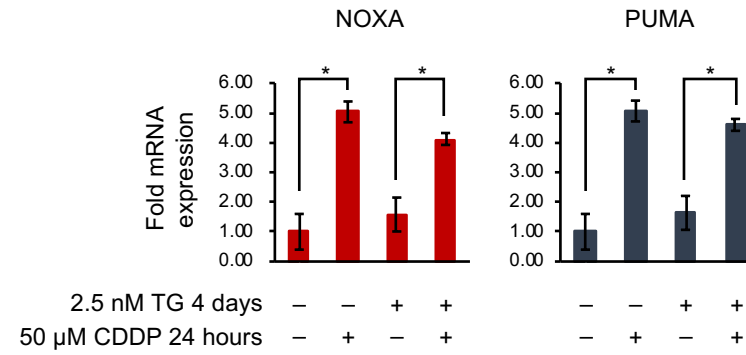

Supplementary Figure 4. 53BP1 translocates to nucleus in cells adaptive to ER stress

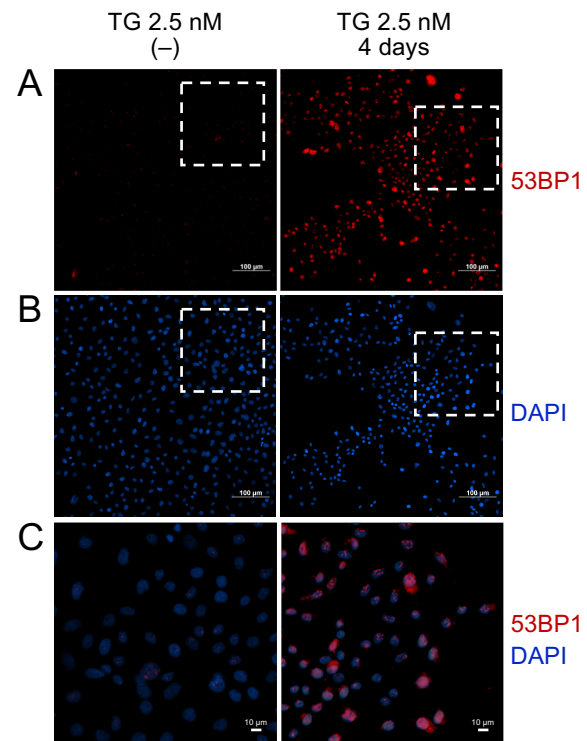



**Supplementary Figure 5.** Adaptation to persistent ER stress decreases the level of phospho-H2AX induced by cisplatin treatment.

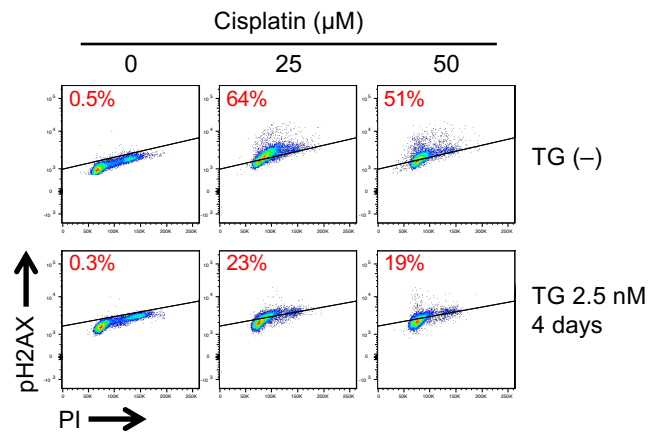

**Supplementary Figure 6.** The uptake of cisplatin was not affected in cells adaptive to ER stress

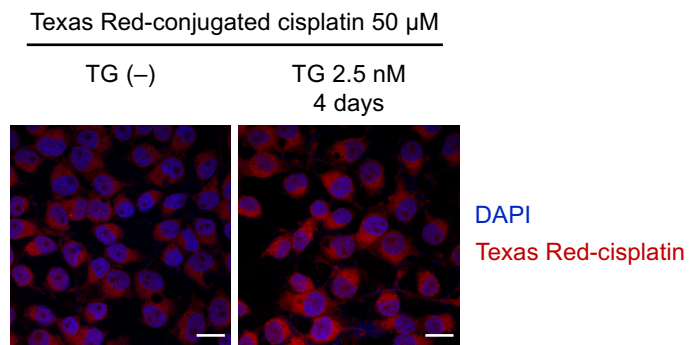

**Supplementary Figure 7.** Adaptation to persistent ER stress is accompanied by an increase in GADD45

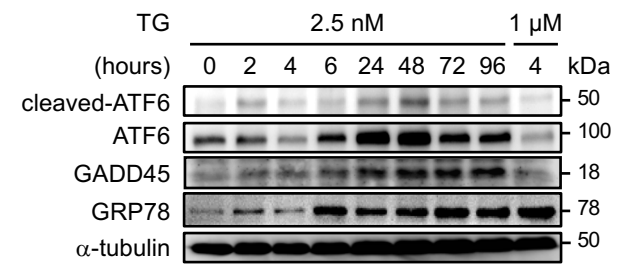

**Supplementary Figure 8.** Adaptation to ER stress lowers the level of intrinsic ROS but is unable to suppress the accumulation of cisplatin-induced ROS.

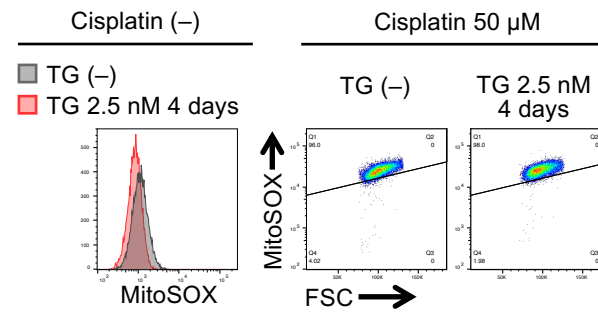

**Supplementary Figure 9.** P53-knockdown cancer cells are not sustainable under prolonged ER stress.

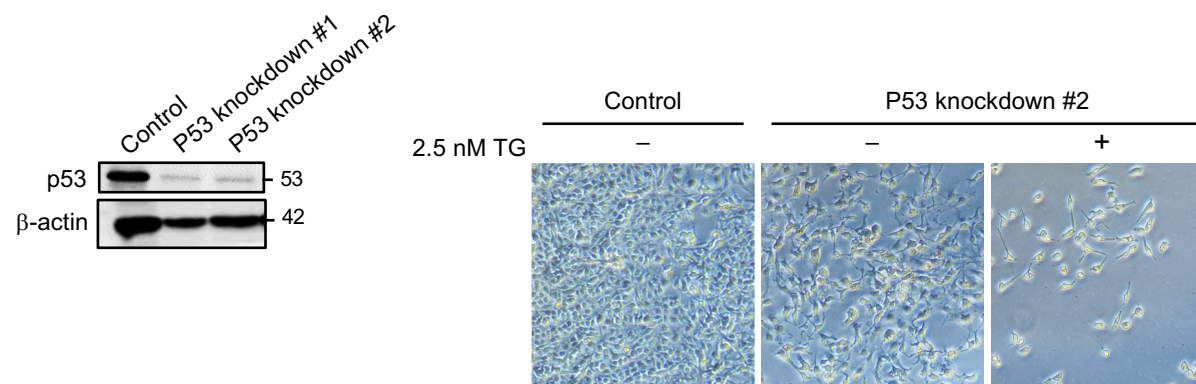

Supplement: ijms-22-00355-s001.pdf [file ijms-22-00355-s001.pdf]
